# Supplementary figures and images for: Self-assembly characteristics of a structural analogue of Tjernberg peptide
Source: Royal Society of Chemistry journal article supplement (doi:10.1039/c3ra47754a), 2014-01-01

## Supplementary figures

Figure 1

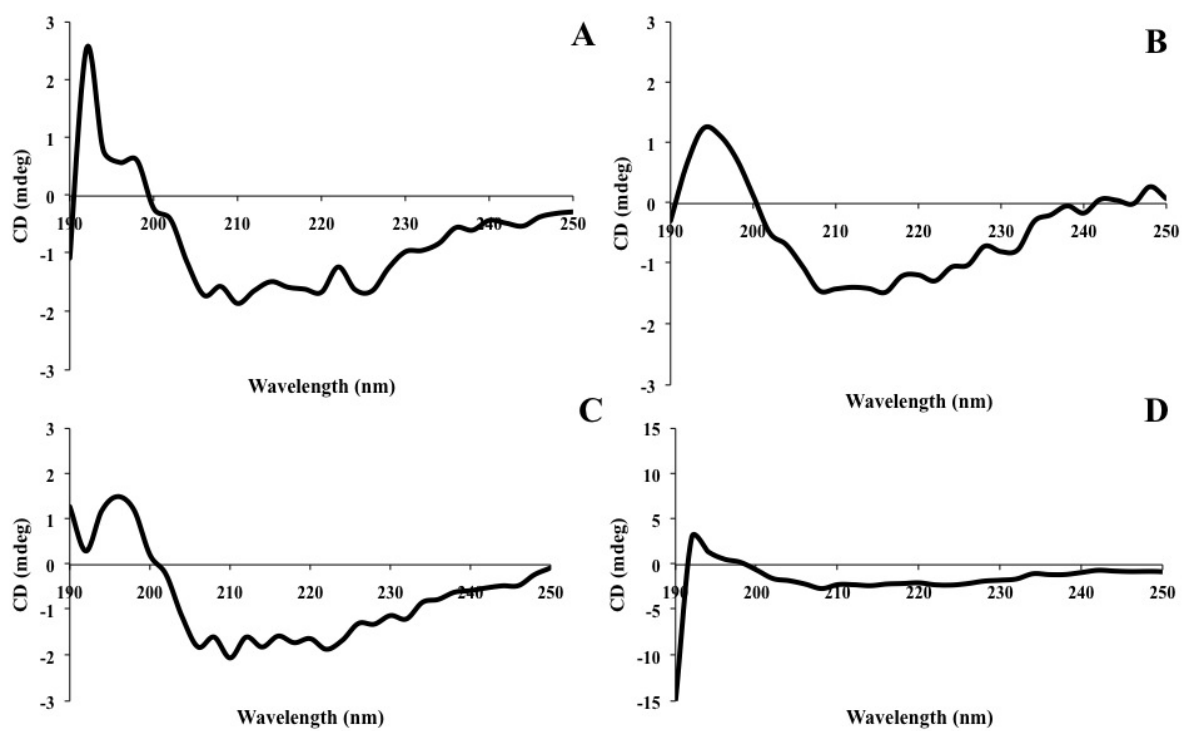

Figure 2

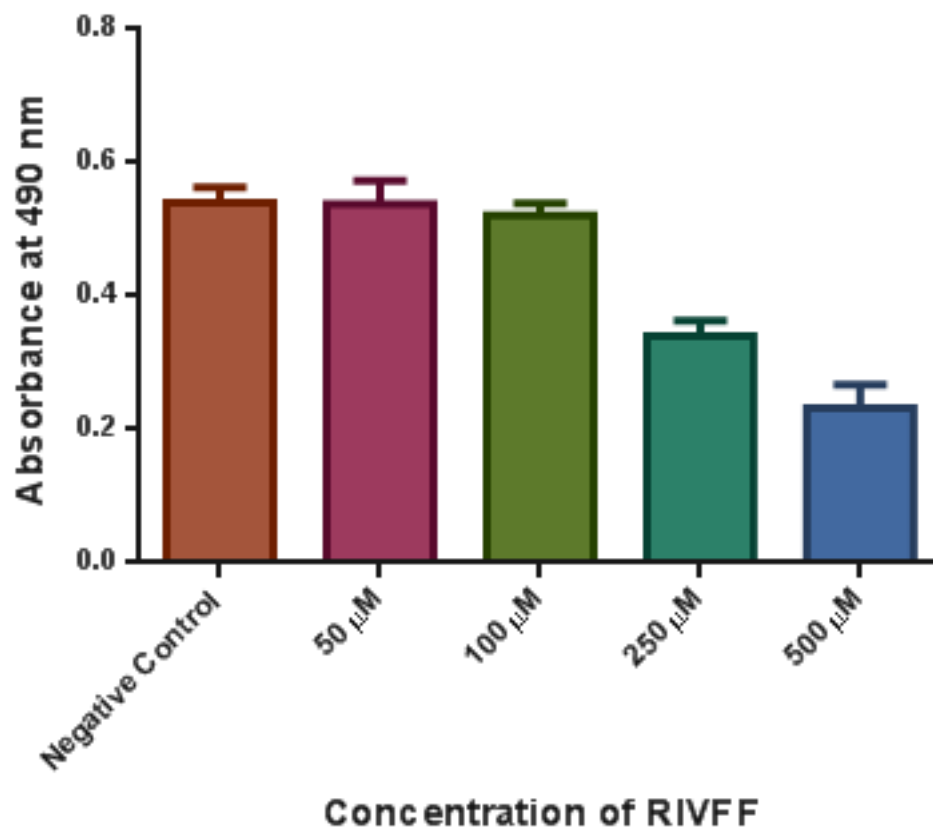

Supplement: c3ra47754a1.pdf [file c3ra47754a1.pdf]
